# Supplementary material for: Sustainable pathway to furanics from biomass via heterogeneous organo-catalysis
Source: Royal Society of Chemistry journal article supplement (doi:10.1039/c6gc02551j), 2016-10-31
Supplement: c6gc02551j1.pdf [file c6gc02551j1.pdf]

## Supporting Information

### **Sustainable pathway to furanics from biomass via heterogeneous organo-catalysis**

Sanny Verma<sup>a†</sup>, R. B. Nasir Baig<sup>a†</sup>, Mallikarjuna N. Nadagouda,<sup>b</sup> Christophe Len<sup>c</sup> and Rajender

S. Varma<sup>a\*</sup>

<sup>a</sup>Sustainable Technology Division, National Risk Management Research Laboratory, U. S. Environmental Protection Agency, MS 443, Cincinnati, Ohio 45268, USA. Fax: 513- 569-7677; Tel: 513-487-2701. E-mail: [varma.rajender@epa.gov](mailto:varma.rajender@epa.gov)

<sup>b</sup>WQMB, WSWRD, National Risk Management Research Laboratory, U. S. Environmental Protection Agency, Cincinnati, Ohio 45268, USA

<sup>c</sup>Sorbonne Universités, Université de Technologie de Compiègne, Compiègne, France

1. Synthesis of g-CN and Sg-CN
  - (a) Synthesis of g-CN
  - (b) Synthesis of Sg-CN
2. General procedure for the synthesis of carbohydrates to value added chemicals
3. General procedure for the synthesis of levulinic acid from glucose
4. Recycling of Sg-CN catalyst (**S1**)
5. Higher magnification SEM image of Sg-CN catalyst (**S2**)
6. TEM image (different view) of Sg-CN catalyst (**S3**)
7. XRD of Sg-CN catalyst (**S4**)
8. N<sub>2</sub> sorption isotherms of Sg-CN (**S5**)
9. Distribution of pore diameter of Sg-CN (**S6**)
10. N<sub>2</sub> sorption isotherms of g-CN (**S7**)
11. Distribution of pore diameter of g-CN (**S8**)
12. EDX of Sg-CN catalyst (**S9**)
13. GC-MS data of the product
14. <sup>1</sup>H and <sup>13</sup>C NMR of the product

## **1. Synthesis of g-CN and Sg-CN catalyst**

### **a) Synthesis of g-CN**

The pure urea obtained from Aldrich was calcinated at 500 °C for 2 hours in a closed furnace. A pale-yellow solid of pure graphitic carbon nitride (g-CN) was obtained and used without any purification.

### **b) Synthesis of Sg-CN catalyst**

Graphitic carbon nitride, g-CN (1.0 g) and dichloromethane (50 mL) were taken in a round bottom flask. Chlorosulfonic acid (0.5 mL) was added to the reaction mixture over the period of 10 min under continuous stirring and then stirring was continued for 3 hours. The ensuing white solid was filtered off, washed with water, methanol and dried under vacuum at 50 °C. The Sg-CN catalyst was characterized by transmission electron microscopy (TEM), scanning electron microscopy (SEM), X-ray diffraction (XRD), Fourier transform infrared spectroscopy (FTIR), Energy-dispersive X-ray spectroscopy (EDX), X-ray photoelectron spectroscopy (XPS) and thermogravimetric analysis (TGA).

## **2. General procedure for the synthesis of carbohydrates to value added chemicals**

A reaction tube equipped with a stir bar was charged with the desired amount of carbohydrate (2 mmol), catalyst (25 mg of Sg-CN and 5.0 mg of KBr, if required) and water (2 mL). The glass tube was then heated in oil bath at 100 °C. After the completion of the reaction, the reaction temperature was brought down to room temperature, the catalyst was recovered *via* filtration/centrifugation and the product was isolated using solvent extraction using ethyl acetate, dried over sodium sulfate, concentrated, and characterized.

### **3. General procedure for the synthesis of levulinic acid from glucose**

A reaction tube equipped with a stir bar was charged with the desired amount of glucose (2 mmol), catalyst (25 mg), and water (2 mL). The glass tube was sealed and placed in an oil bath and heated at 150 °C over a period of 8 hours. After completion of the reaction, the reaction temperature was allowed to come at room temperature. The catalyst was recovered using a centrifuge and the product was isolated using solvent extraction.

#### 4. Recycling of the catalyst

After the completion of each reaction, the Sg-CN catalyst was recovered using a centrifuge,

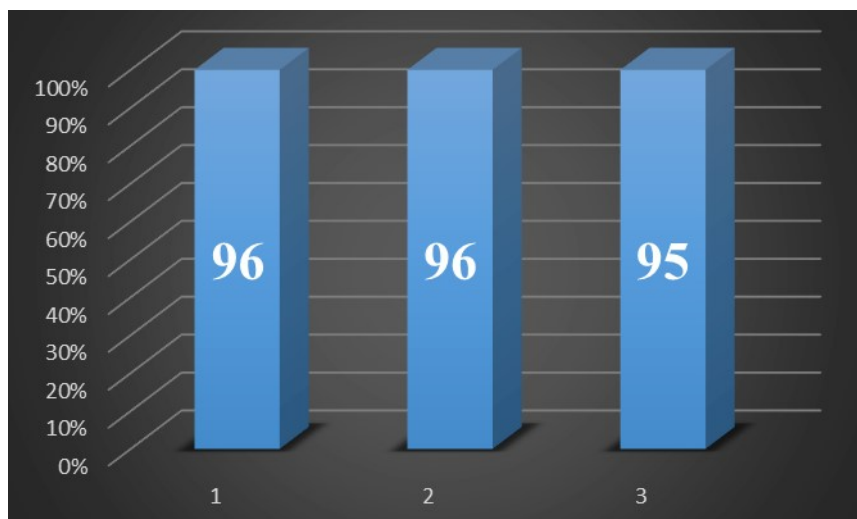

**S1.** Recycling of the catalyst

washed with water followed by acetone, and dried under vacuum and used for the fresh set

of reactants. It was observed that the catalyst remains active even 3<sup>rd</sup> cycle of the reaction.

5. Higher magnification SEM image of Sg-CN catalyst

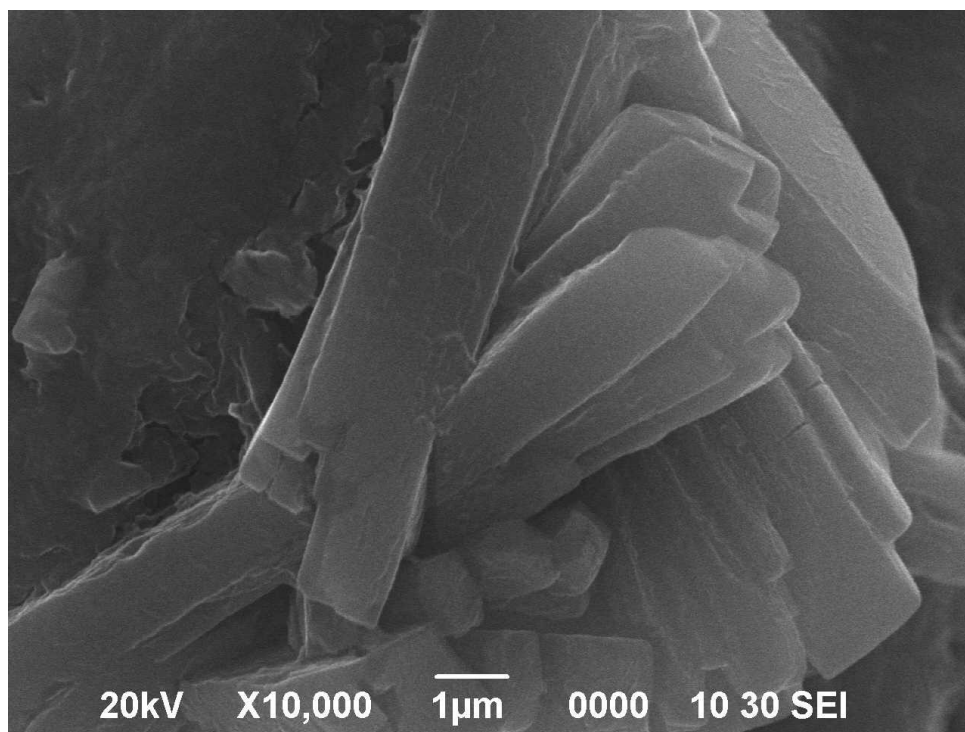

S2. Higher magnification SEM image of Sg-CN catalyst

6. TEM image (different view) of Sg-CN catalyst.

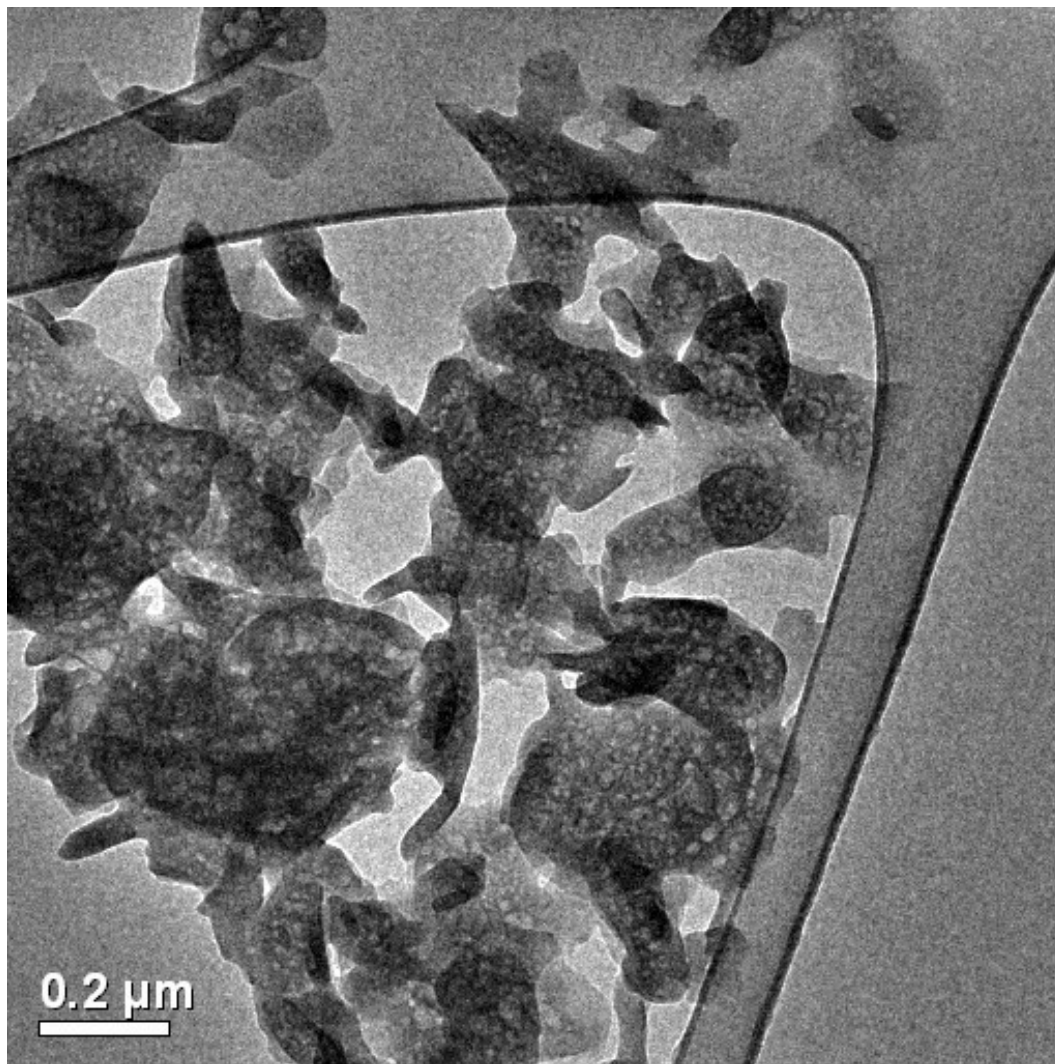

S3. TEM image (different view) of Sg-CN catalyst.

## 7. XRD of Sg-CN catalyst

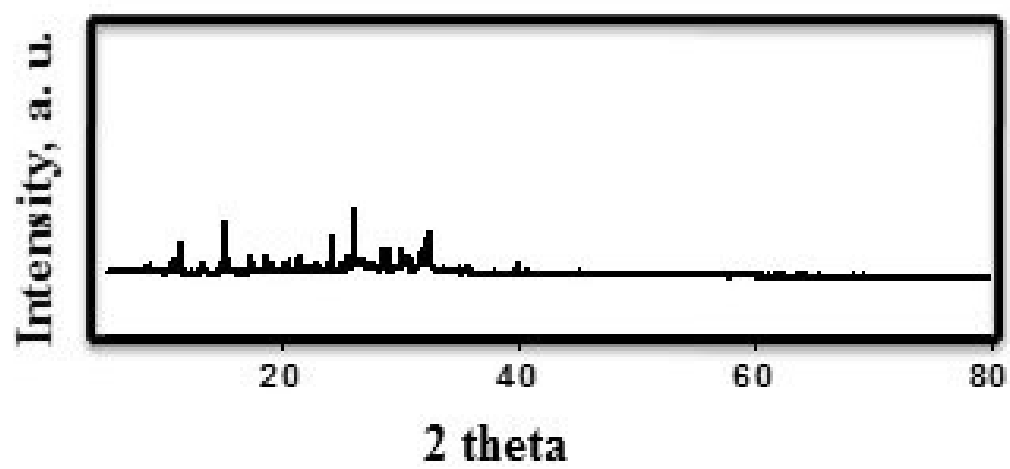

S4. XRD of Sg-CN catalyst

## 8. N<sub>2</sub> sorption isotherms of Sg-CN

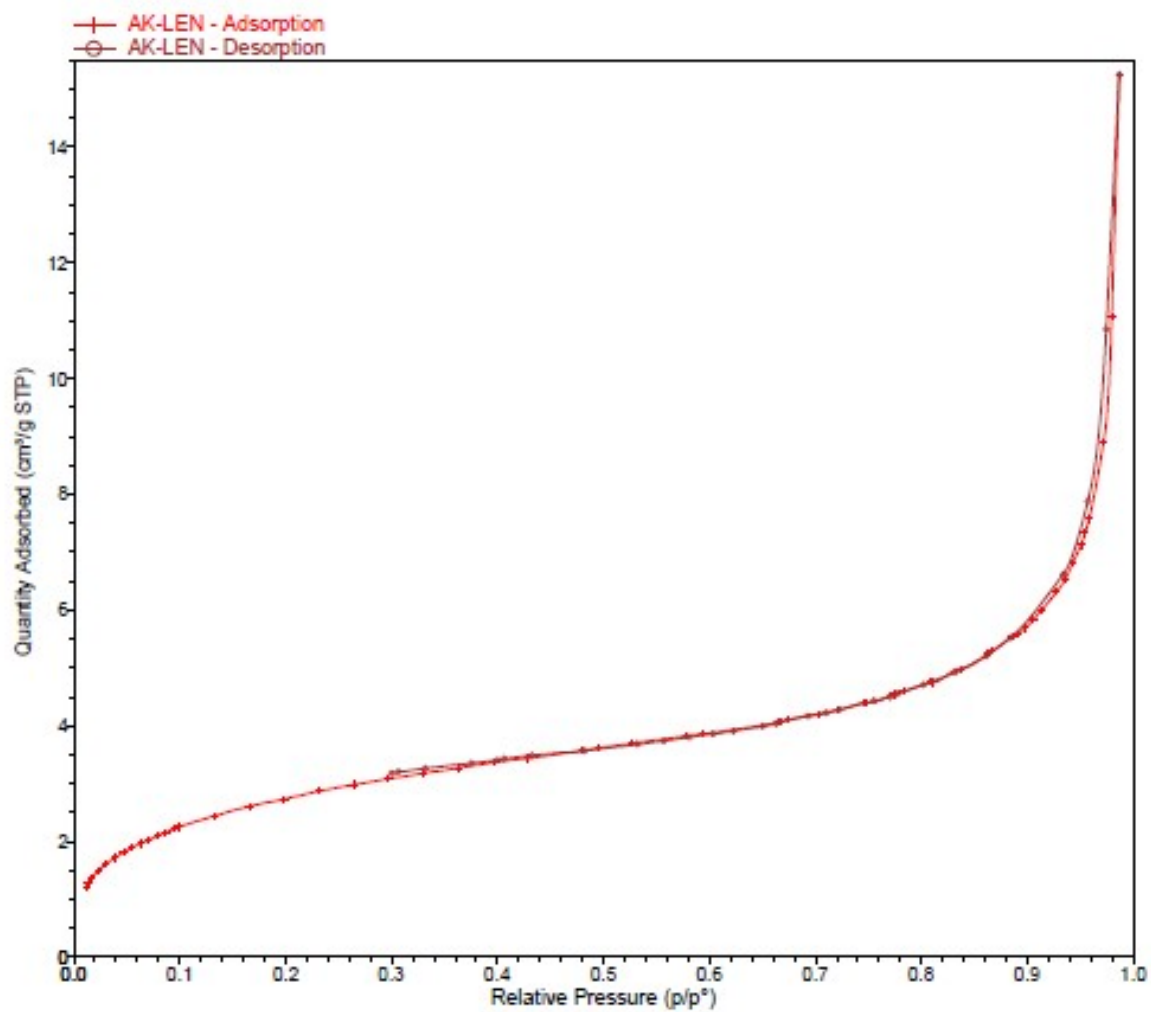

## S5. N<sub>2</sub> sorption isotherms of Sg-CN

## 9. Distribution of pore diameter of Sg-CN

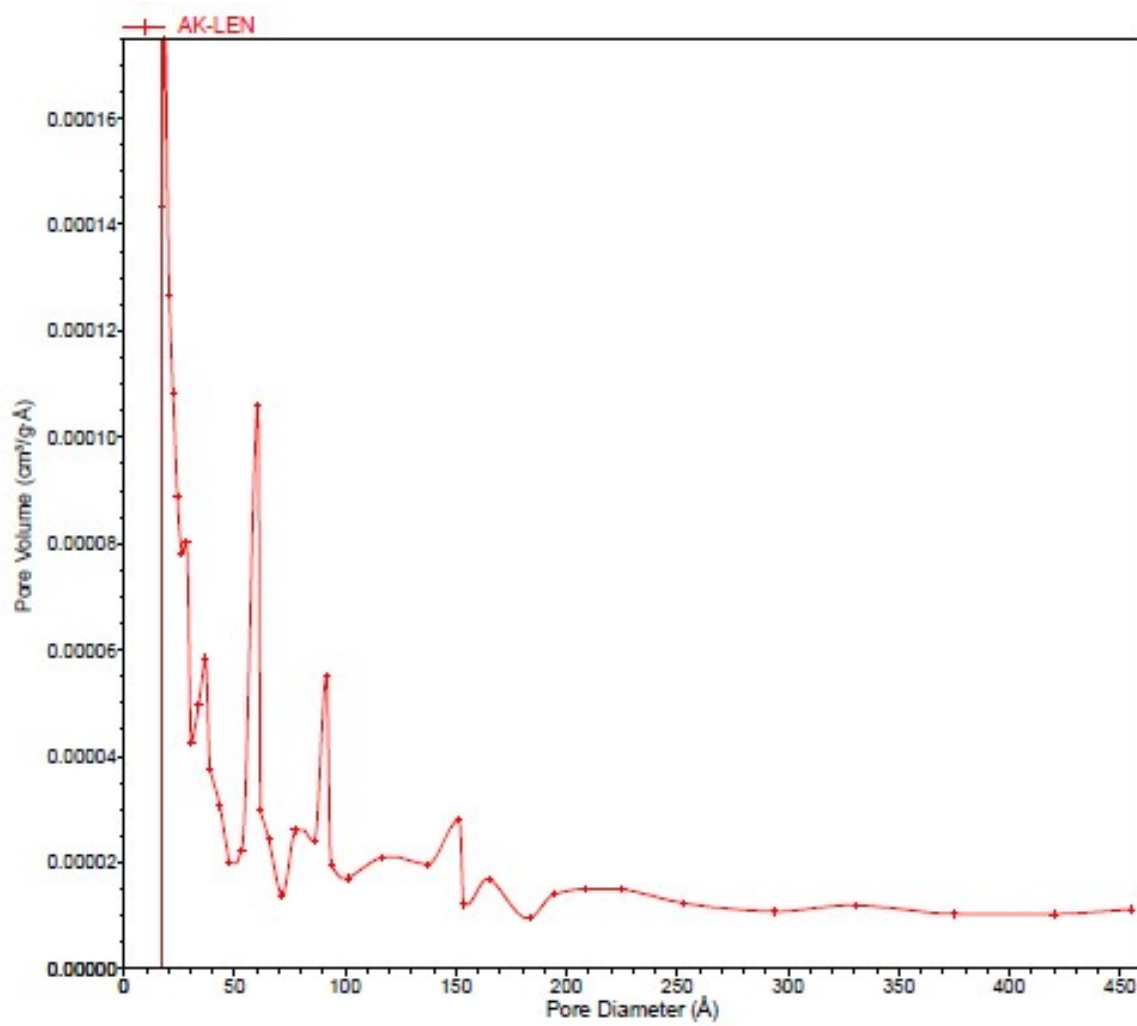

S6. Distribution of pore diameter of Sg-CN

## 10. N<sub>2</sub> sorption isotherms of g-CN

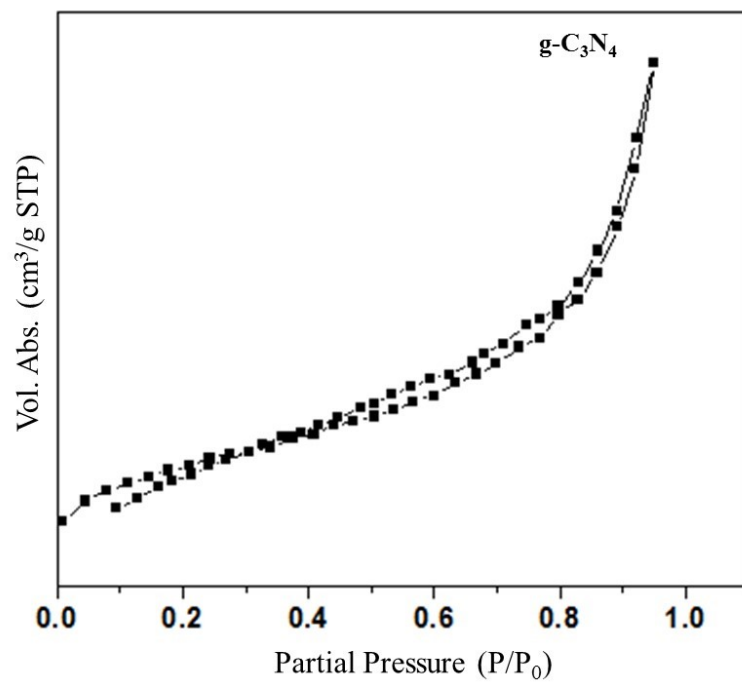

S7. N<sub>2</sub> sorption isotherms of g-CN



## 11. Distribution of pore diameter of g-CN

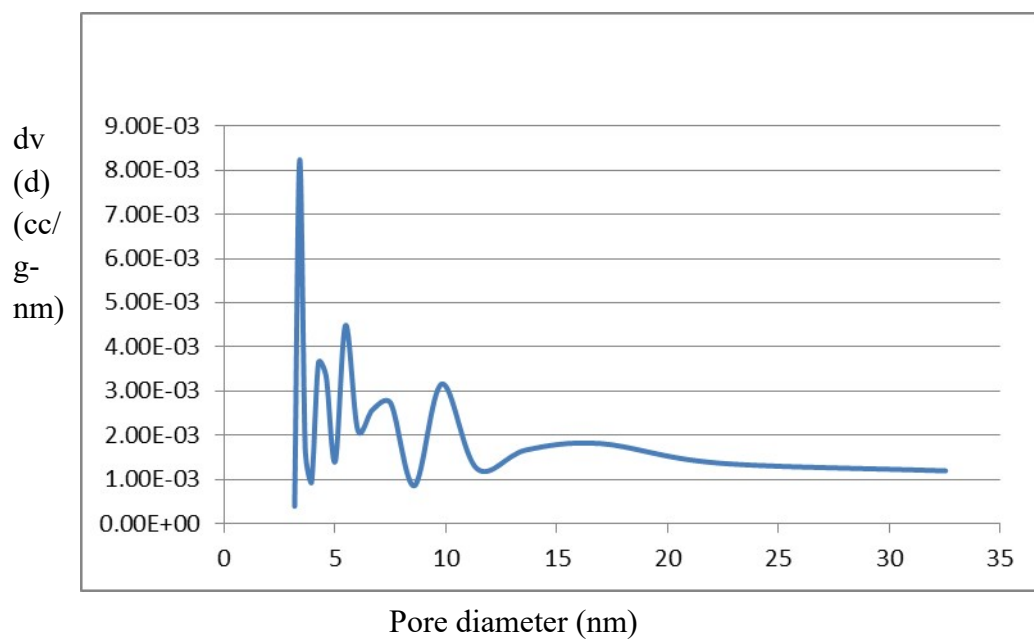

**S8.** Distribution of pore diameter of g-CN

## 12. EDX of Sg-CN catalyst

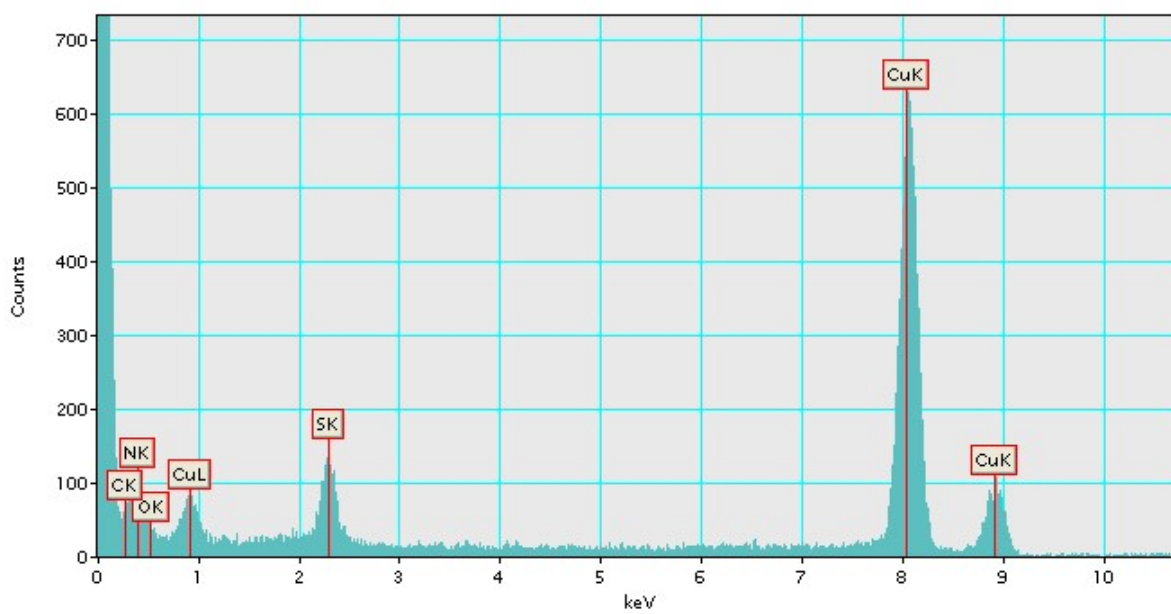

S9. EDX of Sg-CN catalyst

### 13. GC-MASS data of the product

File :C:\Sanny\Data\NS 125 GH.D  
Operator : kt  
Acquired : 20 Oct 2015 12:43 pm using AcqMethod SAMPLES- 20 MIN\_20151015\_A.M  
Instrument : Instrument #1  
Sample Name: NS 125 GH  
Misc Info :  
Vial Number: 12

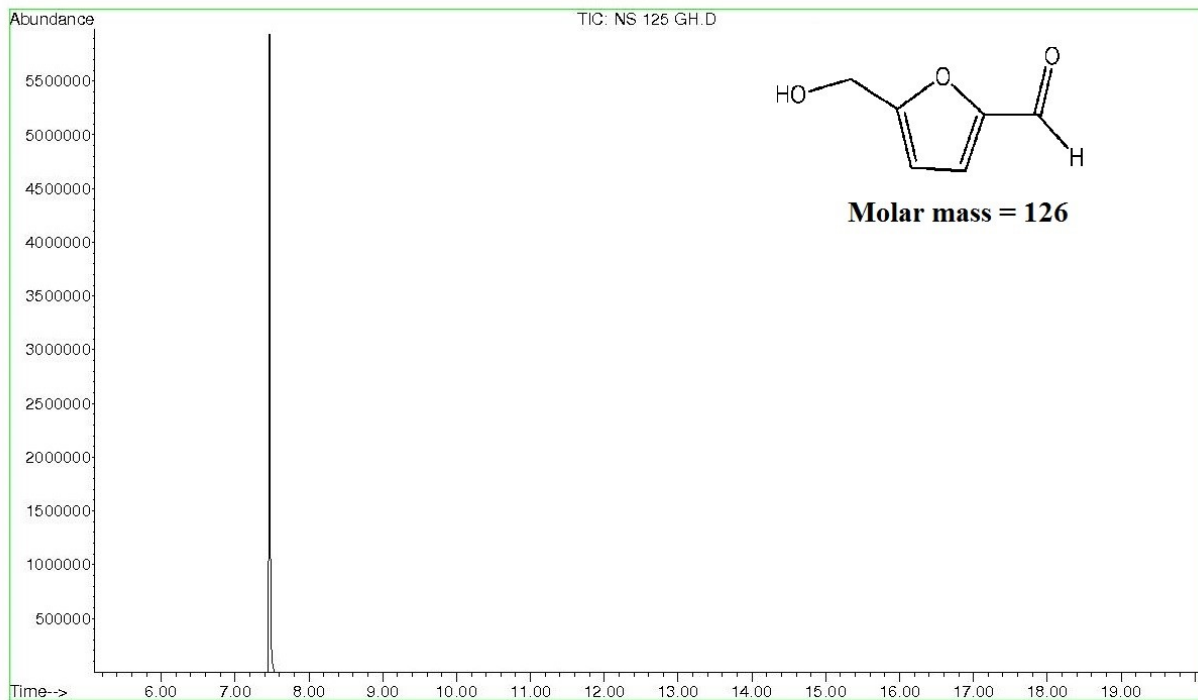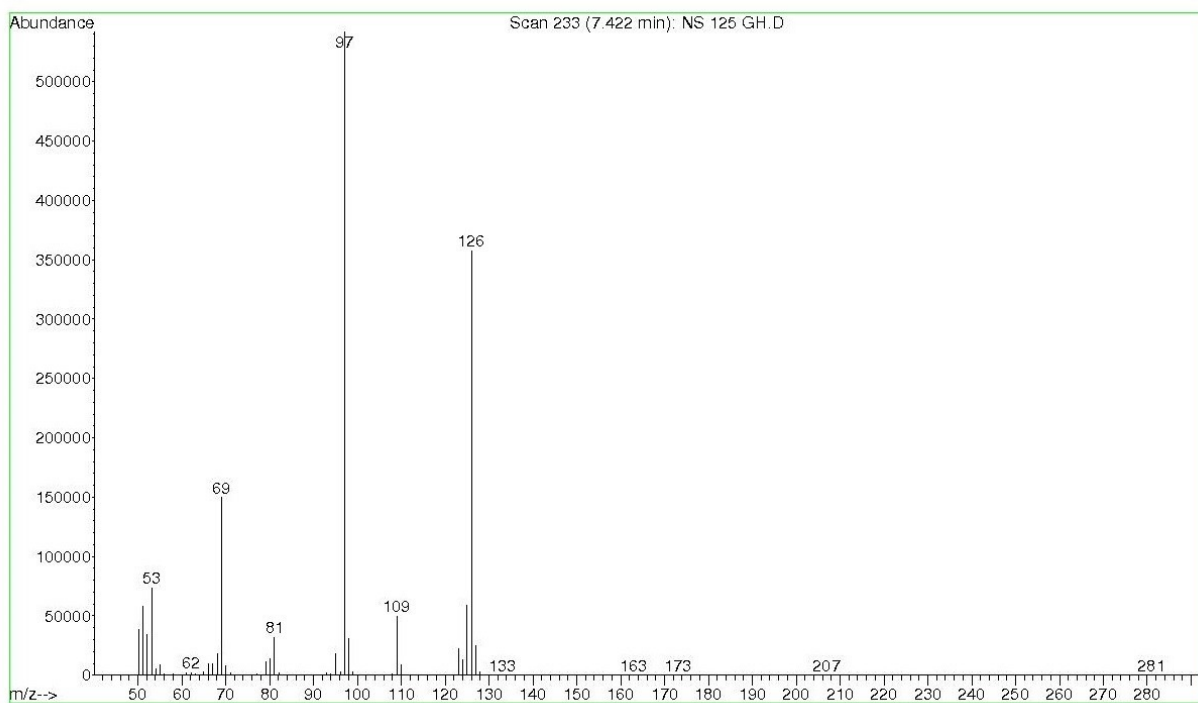

File :C:\Sanny\Data\NS 128.D  
Operator : kt  
Acquired : 26 Oct 2015 3:53 pm using AcqMethod SAMPLES- 20 MIN\_20151015\_A.M  
Instrument : Instrument #1  
Sample Name: NS 128  
Misc Info :  
Vial Number: 15

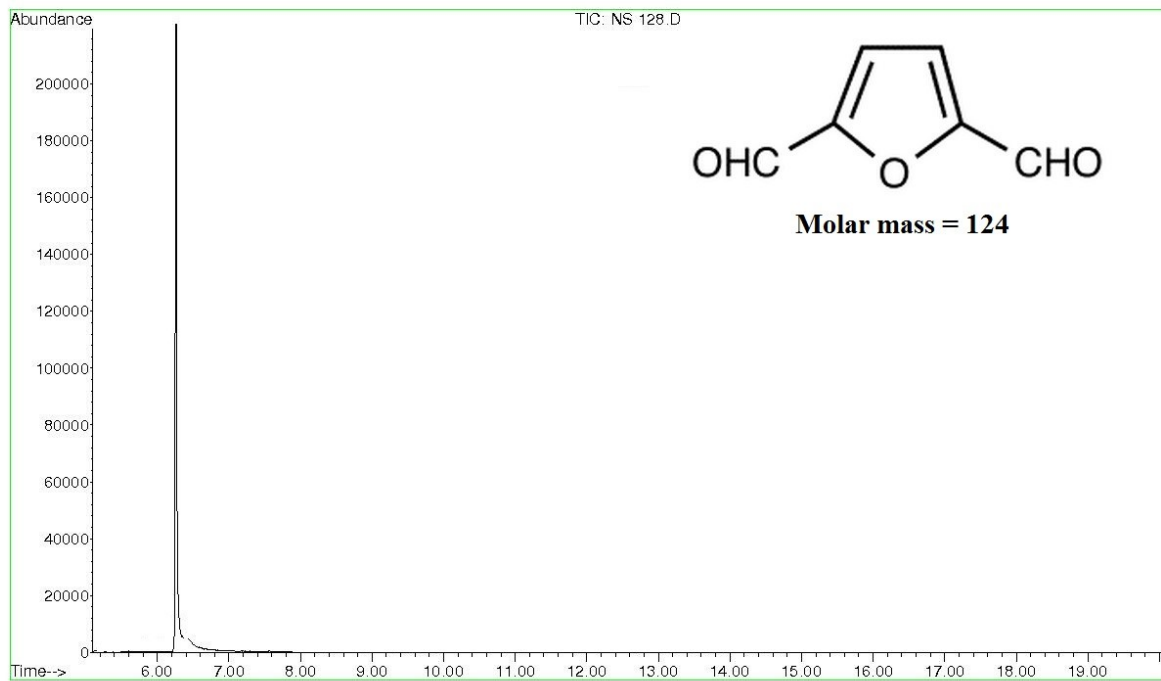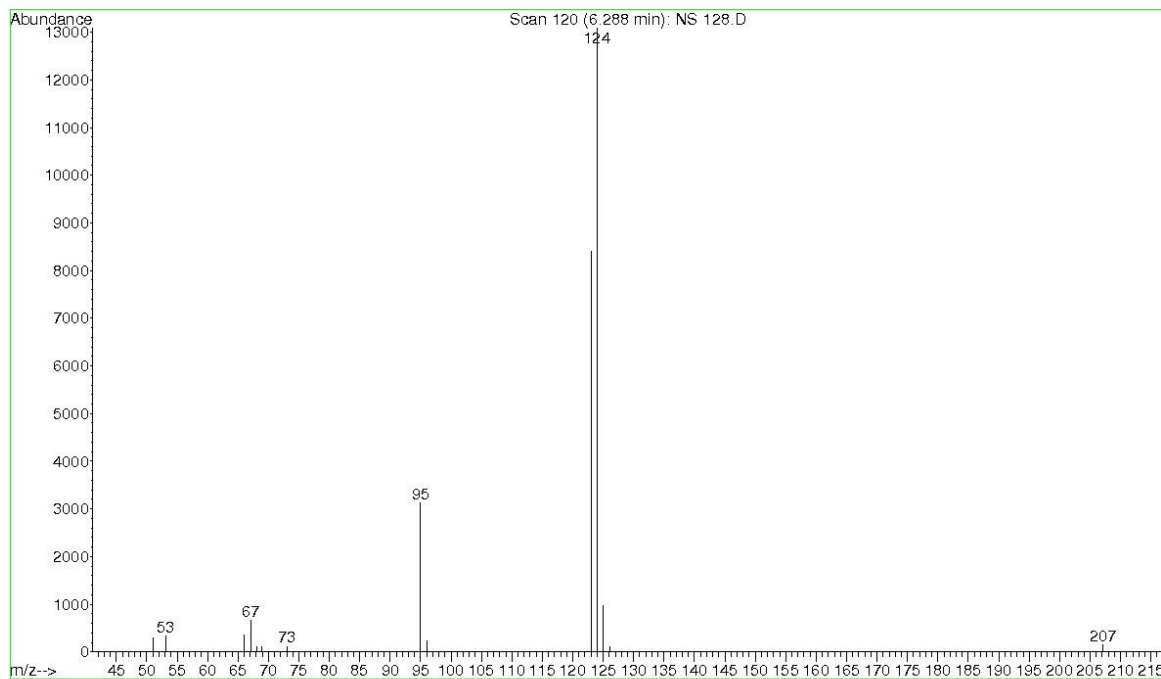

File :C:\Sanny\Data\ns 128 gyt.D  
Operator : kt  
Acquired : 3 Nov 2015 3:31 pm using AcqMethod SAMPLES- 20 MIN\_20151015\_A.M  
Instrument : Instrument #1  
Sample Name: ns 128 gyt  
Misc Info :  
Vial Number: 6

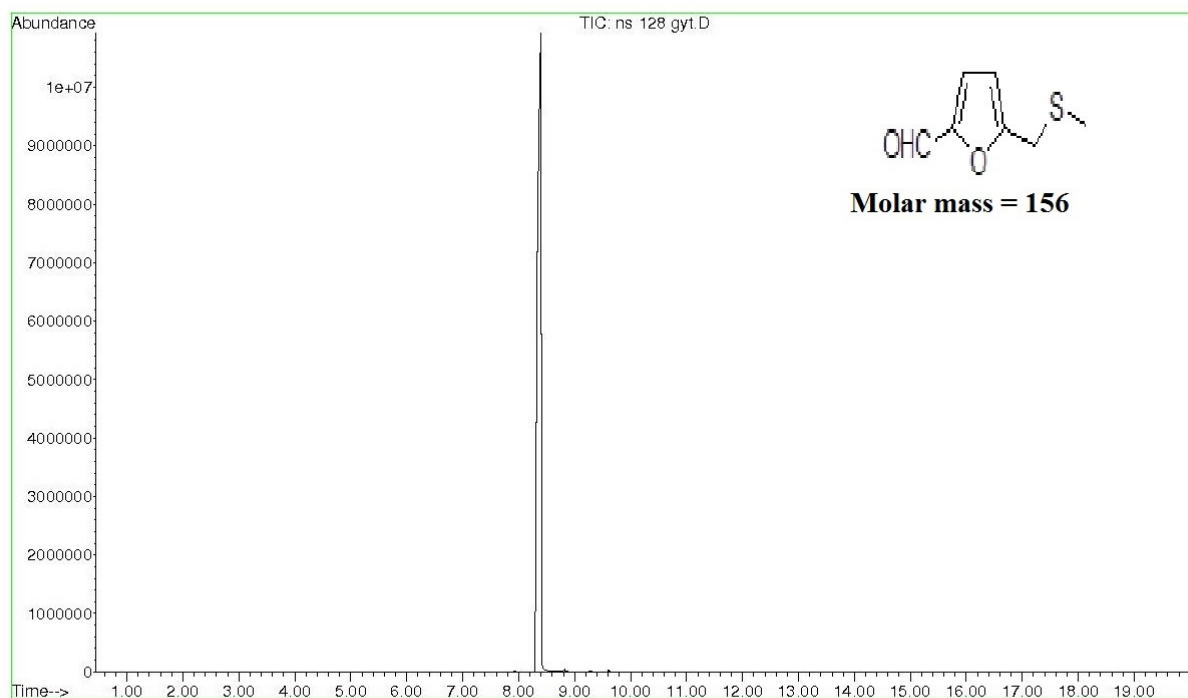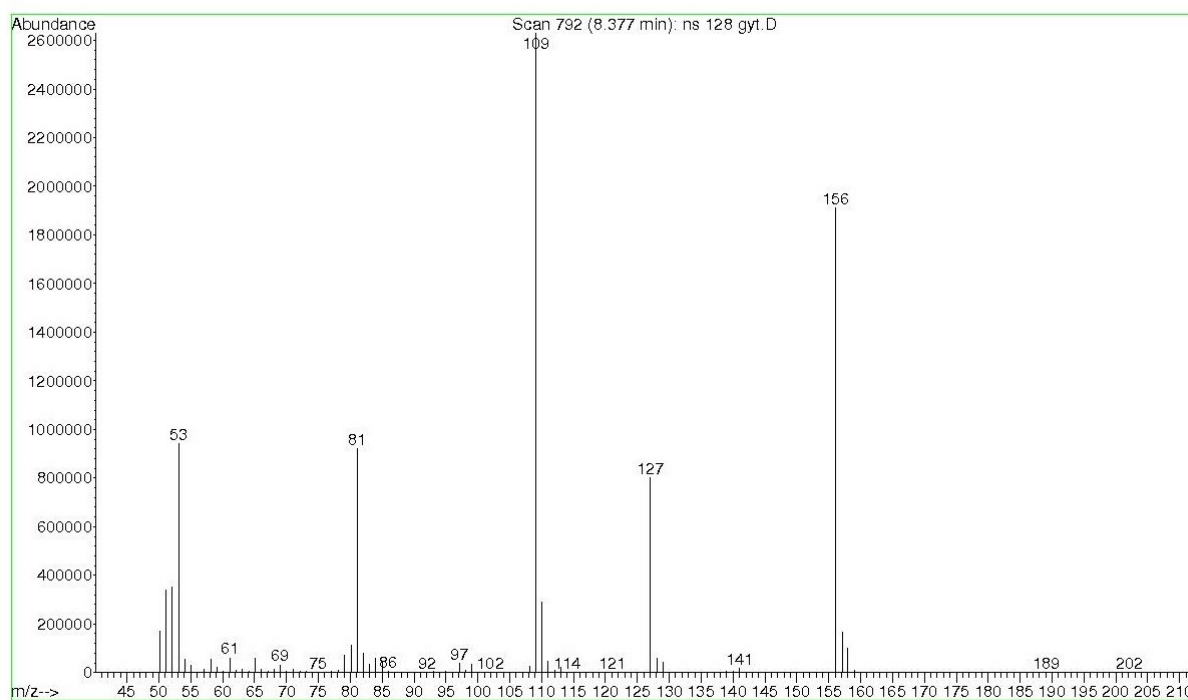

File :C:\Sanny\Data\NS 135.D  
Operator : kt  
Acquired : 25 Nov 2015 4:13 pm using AcqMethod SAMPLES- 20 MIN\_20151015\_A.M  
Instrument : Instrument #1  
Sample Name: NS 135  
Misc Info :  
Vial Number: 13

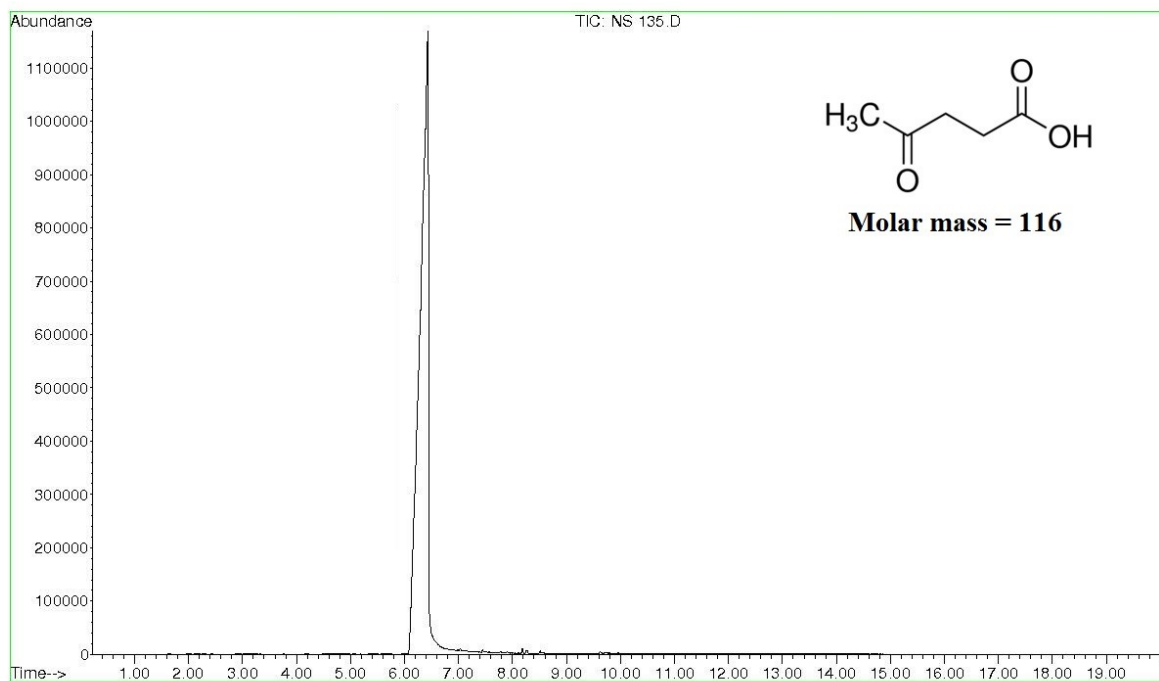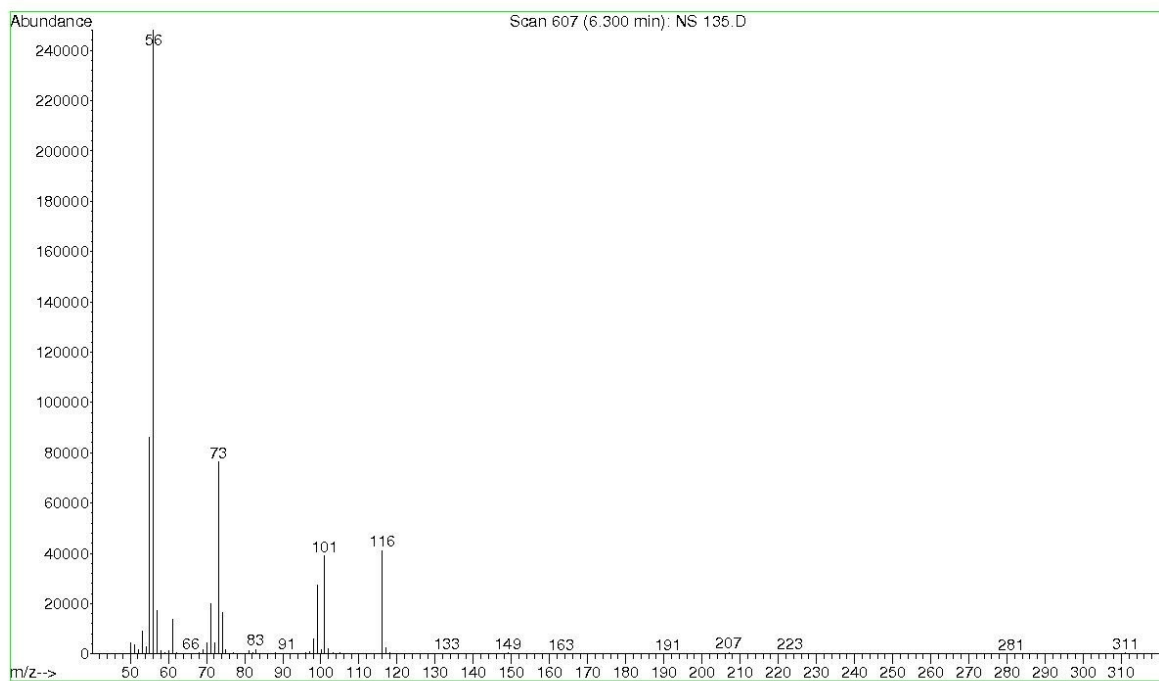

File :C:\Sanny\Data\NS 164 (35).D  
Operator : kt  
Acquired : 25 Jan 2016 11:20 am using AcqMethod SAMPLES- 20 MIN\_20151015\_A.M  
Instrument : Instrument #1  
Sample Name: NS 164 (35)  
Misc Info :  
Vial Number: 100

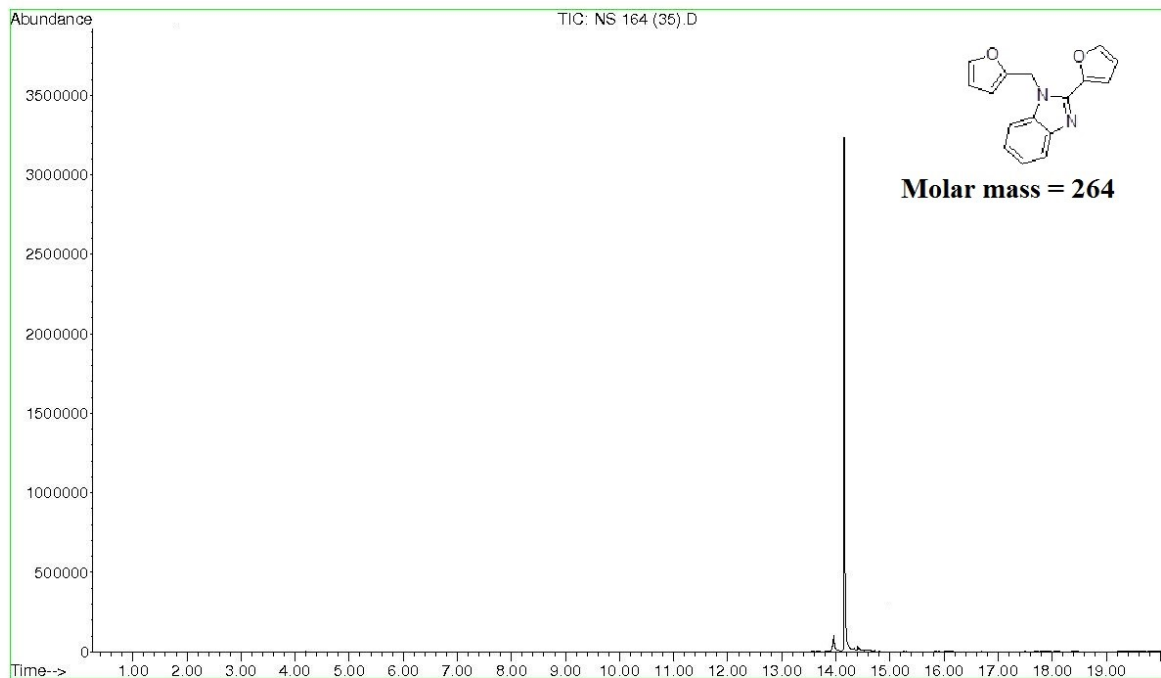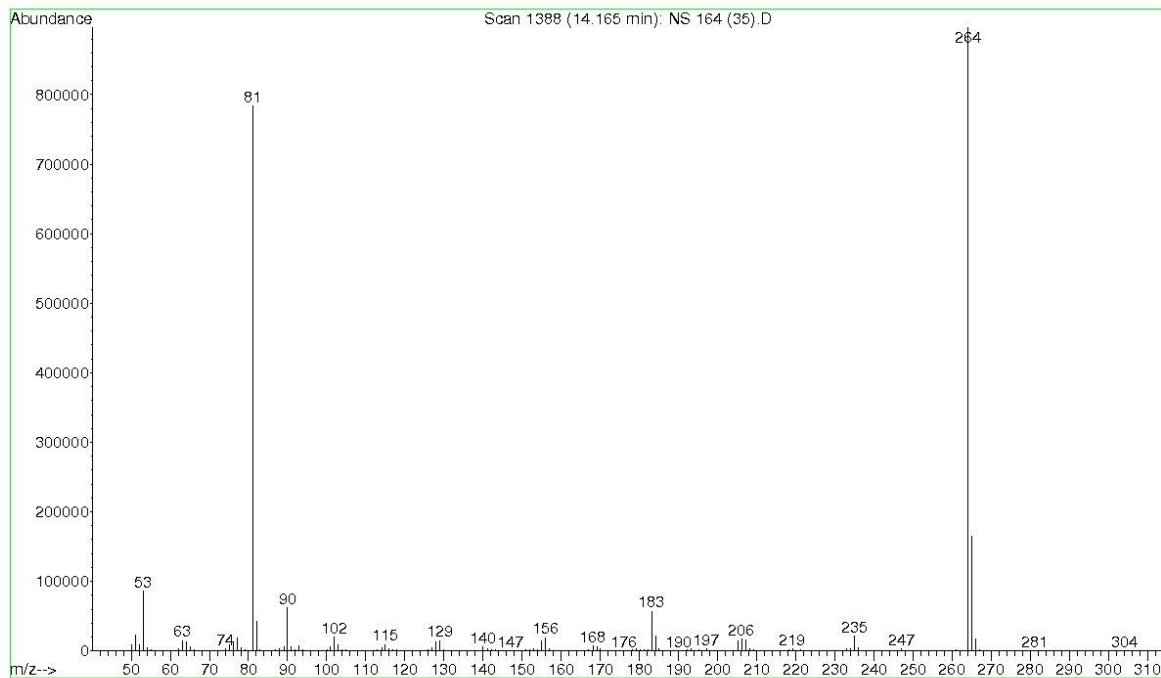

#### 14. $^1\text{H}$ and $^{13}\text{C}$ NMR of the product

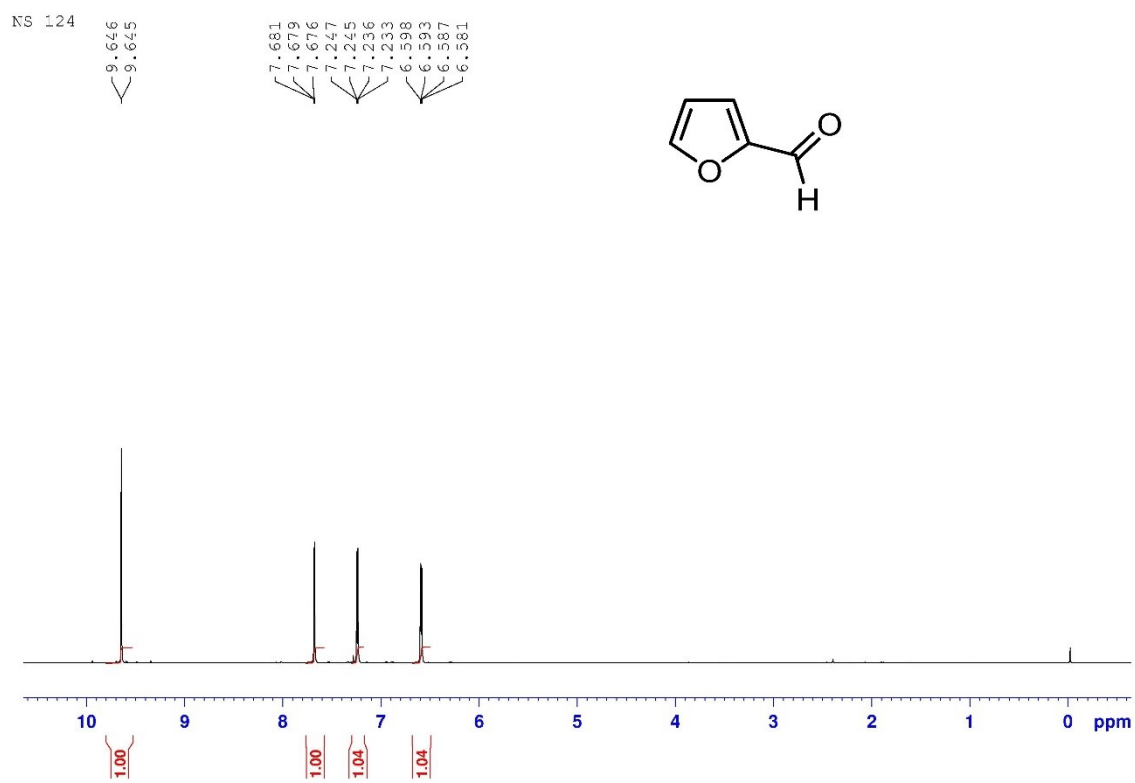

NS 124 13CNMR

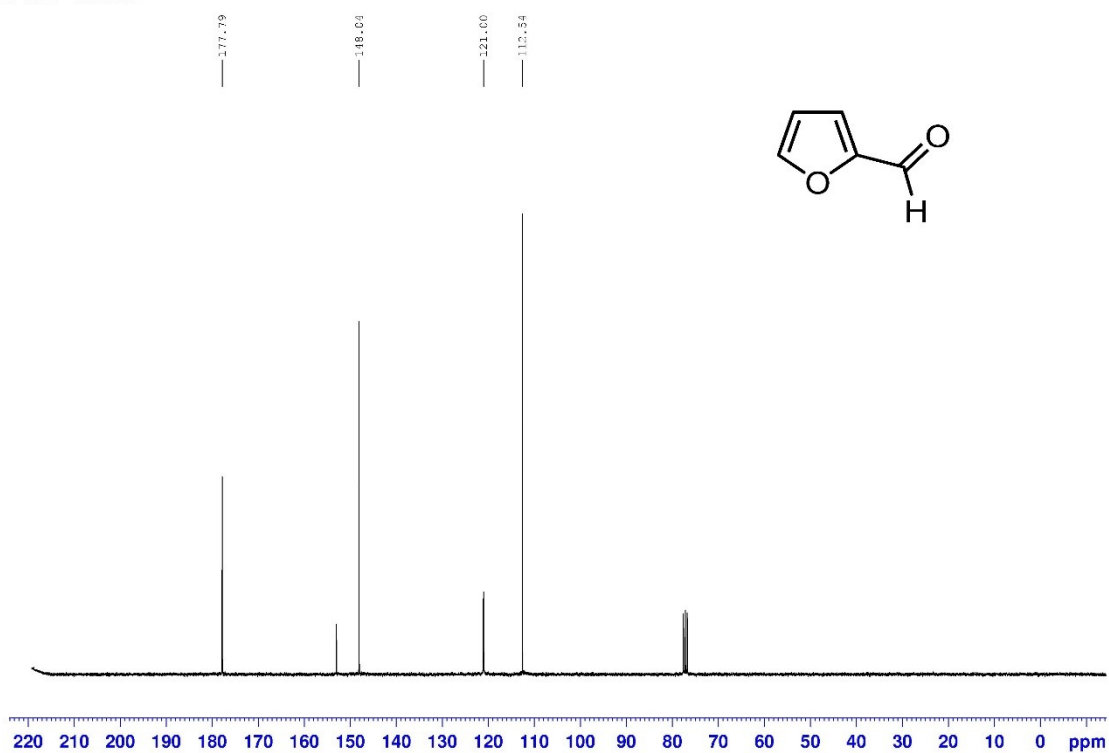

NS 125

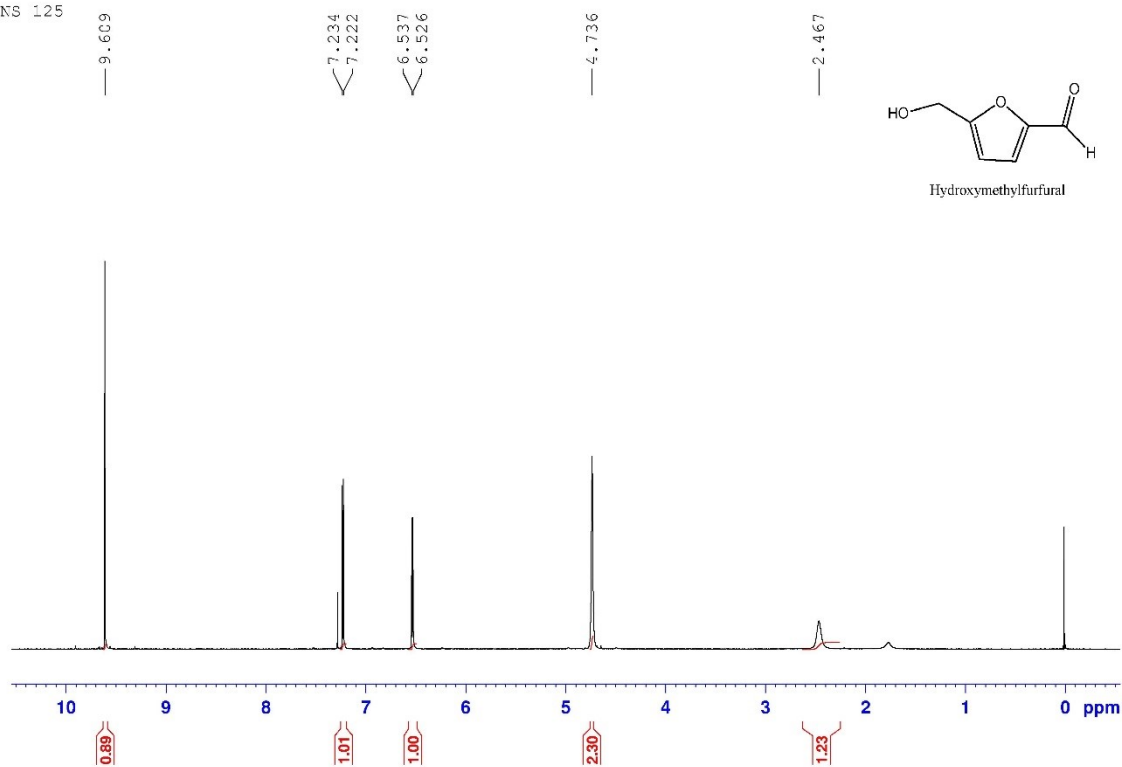

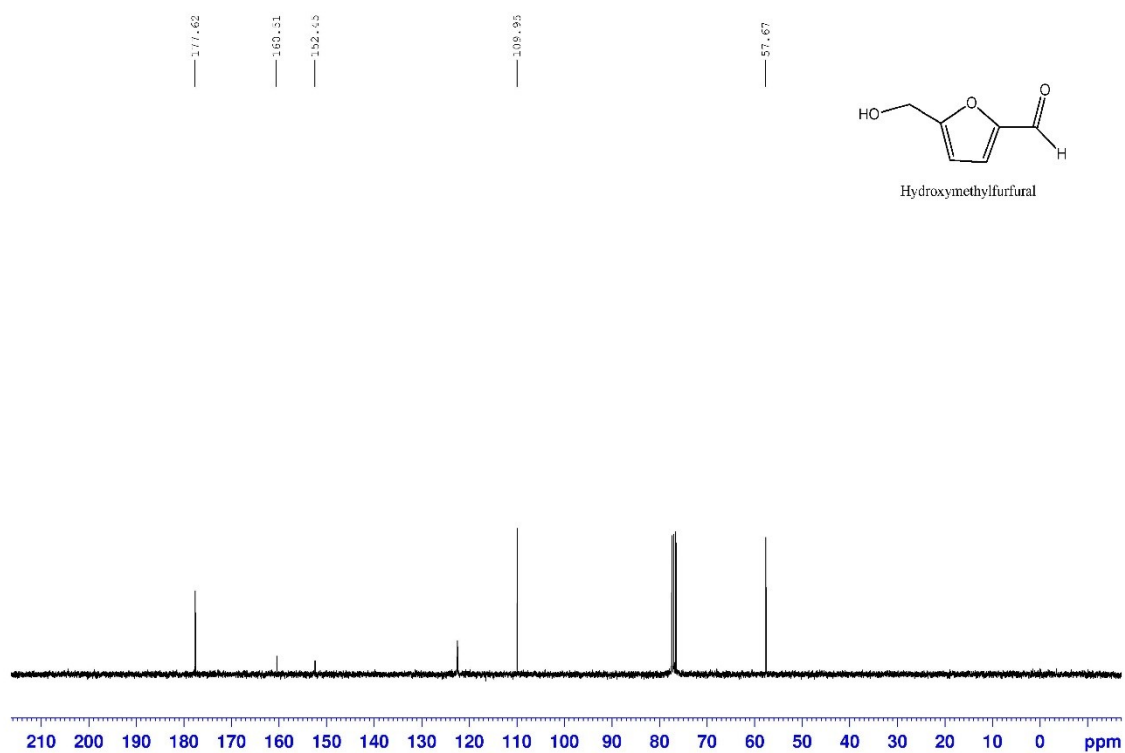

NS 128 F

— 9.885

— 7.349

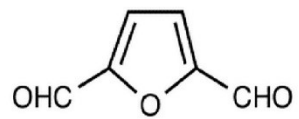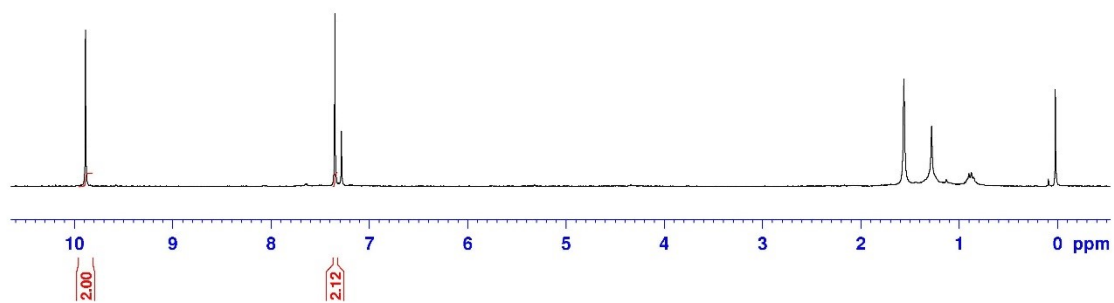

NS 128 13CNMR

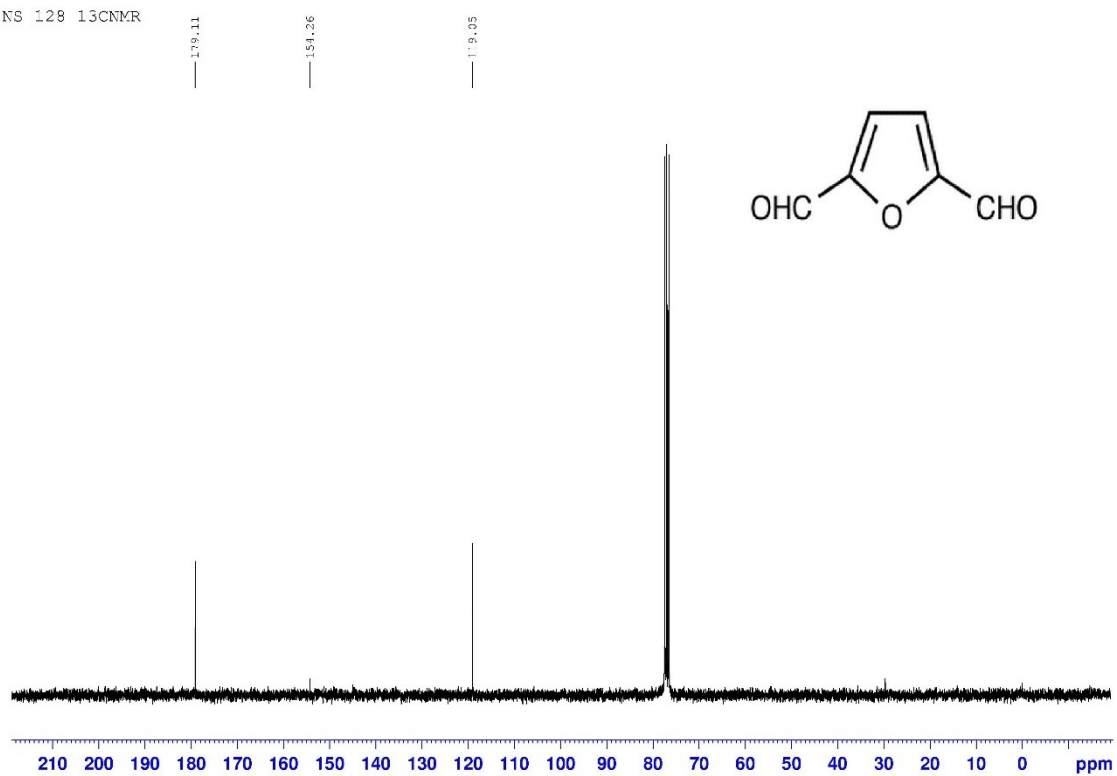

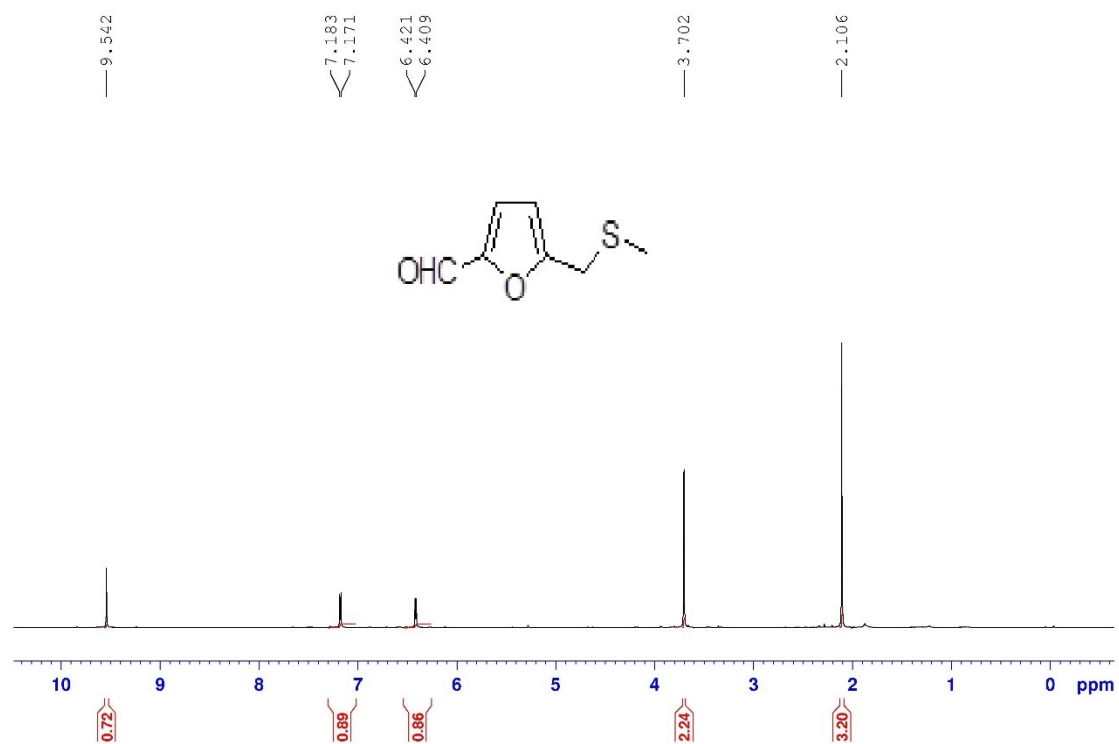

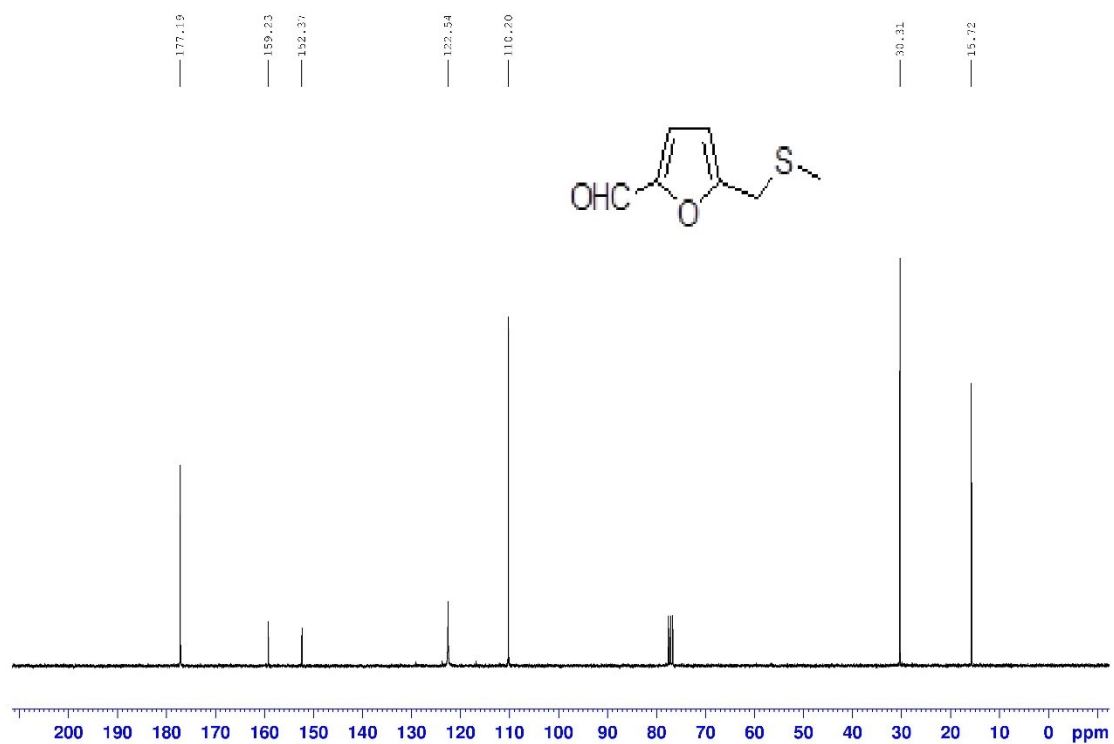

NS 135\_1HNMR

— 7.870

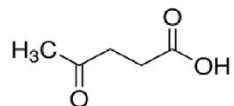

2.779  
2.776  
2.757  
2.734  
2.647  
2.644  
2.627  
2.623  
2.621  
2.604  
2.600

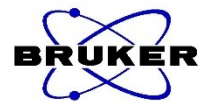

NAME NS 135 1HNMR  
EXPNO 1  
PROCNO 1  
Date\_ 2015102  
Time 15.48  
INSTRUM spect  
PROBHD 5 mm BBO BB-1H  
PULPROG zg  
TD 32768  
SOLVENT CDCl3  
NS 16  
DS 2  
SWH 6188.119 Hz  
FIDRES 0.188846 Hz  
AQ 2.6477852 sec  
RG 181  
DM 80.800 usec  
DE 6.50 usec  
TE 303.0 K  
D1 1.30000000 sec  
TD0 1

===== CHANNEL f1 =====  
NUC1 1H  
P1 13.00 usec  
PL1 3.20 dB  
PL1W 12.02264404 W  
SFO1 300.1318534 MHz  
SI 32768  
SF 300.1300000 MHz  
WDW EK  
SSB 0  
LB 0.30 Hz  
GB 0  
PC 1.00

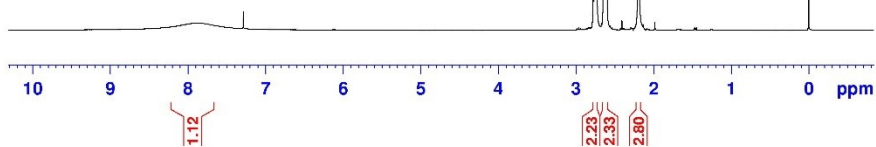

NS 135\_13CNMR

207.18  
177.92

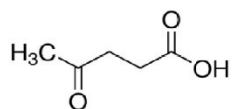

37.69  
29.67  
27.75

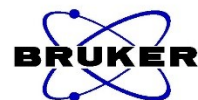

NAME NS 135\_13CNMR  
EXPNO 2  
PROCNO 1  
Date\_ 20151102  
Time 21.09  
INSTRUM spect  
PROBHD 5 mm BBO BB-1H  
PULPROG zgpg  
TD 32768  
SOLVENT CDCl3  
NS 5000  
DS 4  
SWH 17985.611 Hz  
FIDRES 0.548877 Hz  
AQ 0.9110282 sec  
RG 8192  
DW 27.800 usec  
DE 6.50 usec  
TE 303.2 K  
D1 2.00000000 sec  
D11 0.03000000 sec  
TD0 1

===== CHANNEL f1 =====  
NUC1 13C  
P1 10.00 usec  
PL1 1.80 dB  
PL1W 49.78760910 W  
SFO1 75.4752953 MHz

===== CHANNEL f2 =====  
CPDPRG2 waltz16  
NUC2 1H  
PCPD2 80.00 usec  
PL2 3.20 dB  
PL12 18.98 dB  
PL2W 12.02264404 W  
PL12W 0.31768745 W  
SFO2 300.1312005 MHz  
S1 32768  
S2 75.4677490 MHz  
WDW EM  
SSB 0  
LB 1.00 Hz  
GB 0  
PC 1.40

200 180 160 140 120 100 80 60 40 20 0 ppm
